# Supplementary material for: Dreaming with hippocampal damage
Source: eLife. 2020 Jun 8;9:e56211. doi: 10.7554/eLife.56211 (PMC7279885; doi:10.7554/eLife.56211)
Supplement: Supplementary file 1. — This table provides details of the neuropsychological profile (summary data and statistical analyses) of the patients across a range of cognitive tests, and indicates the selective nature of their memory loss. [file elife-56211-supp1.docx]

**Supplementary File 1. Summary of neuropsychological information.**

|  |  |  |  |  |  |  |  |
| --- | --- | --- | --- | --- | --- | --- | --- |
|  | HPC |  | CTLa |  |  |  |  |
|  | M (SD) |  | M (SD) |  | U | ES | P-Value |
| *General cognition* |  |  |  |  |  |  |  |
| WASI Similarities scaled score1 | 11.75 (0.96) |  | 11.83 (2.55) |  | 21 | 0.18 | 0.713 |
| *Episodic memory* |  |  |  |  |  |  |  |
| Autobiographical Interview2 internal (‘episodic’) detailsb | 32.55 (5.63) |  | 46.43 (12.82) |  | 3.0 | 1.65 | **0.030** |
| Autobiographical Interview total word countb | 7266.75 (2918.23) |  | 5224.13 (2513.48) |  | 10.0 | 0.62 | 0.308 |
| WMS Logical Memory3 (immediate recall, units) | 8.00 (2.71) |  | 12.58 (3.18) |  | 7.0 | 1.20 | **0.038** |
| WMS Logical Memory (immediate recall, thematic) | 8.00 (2.16) |  | 13.75 (2.96) |  | 3.0 | 1.65 | **0.010** |
| WMS Logical Memory (delayed recall, units) | 7.25 (2.87) |  | 13.17 (3.74) |  | 4.0 | 1.53 | **0.015** |
| WMS Logical Memory (delayed recall, thematic) | 7.25 (3.10) |  | 13.50 (3.18) |  | 3.5 | 1.59 | **0.012** |
| WMS Word Lists (immediate recall) scaled score | 9.50 (3.87) |  | 13.25 (3.17) |  | 11.5 | 0.82 | 0.126 |
| WMS Word Lists (delayed recognition) scaled score | 10.00 (2.71) |  | 11.67 (1.37) |  | 17.0 | 0.43 | 0.373 |
| Rey-Osterrieth Complex Figure4 (immediate recall /36) | 19.50 (6.61) |  | 23.8 (7.36) |  | 10.5 | 0.90 | 0.178 |
| Rey-Osterrieth Complex Figure (delayed recall, /36) | 19.75 (5.06) |  | 23.92 (7.75) |  | 11.0 | 0.86 | 0.113 |
| Warrington Recognition Memory Test5 for Words scaled score | 11.25 (0.96) |  | 12.00 (2.34) |  | 18.5 | 0.34 | 0.495 |
| Warrington Recognition Memory Test for Faces scaled score | 8.00 (2.16) |  | 11.33 (2.96) |  | 7.0 | 1.20 | **0.036** |
| *Semantic memory* |  |  |  |  |  |  |  |
| Warrington Graded Naming Test6,7 scaled score | 11.00 (2.16) |  | 13.67 (2.42) |  | 9.0 | 1.02 | 0.065 |
| Autobiographical Interview external (‘semantic’) detailsb | 7.63 (3.74) |  | 5.90 (3.67) |  | 14.0 | 0.20 | 0.730 |
| *Attention/working memory* |  |  |  |  |  |  |  |
| WMS Digit Span (forward) scaled score | 11.50 (3.11) |  | 13.25 (3.22) |  | 19.5 | 0.28 | 0.581 |
| *Executive functions* |  |  |  |  |  |  |  |
| D-KEFS Letter Fluency Test (FAS)8 scaled score | 12.25 (2.87) |  | 14.33 (3.20) |  | 14.5 | 0.60 | 0.247 |
| D-KEFS Category Fluency Test scaled score | 13.50 (5.74) |  | 13.92 (4.38) |  | 22.0 | 0.12 | 0.807 |
| D-KEFS Category Switching Test scaled score | 13.00 (4.24) |  | 12.67 (2.93) |  | 22.0 | 0.12 | 0.806 |
| D-KEFS Color-Word Interference Test scaled score | 13.25 (2.50) |  | 12.42 (2.23) |  | 18.5 | 0.34 | 0.501 |
| D-KEFS Trails Test (visual scanning) scaled score | 11.25 (0.96) |  | 12.00 (1.28) |  | 15.0 | 0.57 | 0.261 |
| D-KEFS Trails Test (number sequencing) scaled score | 11.00 (1.41) |  | 11.83 (2.52) |  | 15.5 | 0.53 | 0.292 |
| D-KEFS Trails Test (letter sequencing) scaled score | 10.50 (3.00) |  | 12.50 (1.51) |  | 15.5 | 0.53 | 0.280 |
| D-KEFS Trails Test (number-letter sequencing) scaled score | 9.75 (2.06) |  | 12.83 (1.03) |  | 3.0 | 1.65 | **0.008** |
| D-KEFS Trails Test (motor speed) scaled score | 12.00 (0.82) |  | 11.75 (1.14) |  | 19.5 | 0.28 | 0.568 |
| Hayling Sentence Completion Test9 (coherent) | 5.75 (0.50) |  | 6.08 (1.00) |  | 20.0 | 0.24 | 0.606 |
| Hayling Sentence Completion Test (incoherent) | 5.75 (0.50) |  | 5.75 (0.75) |  | 23.0 | 0.06 | 0.882 |
| Hayling Sentence Completion Test (errors) | 6.25 (2.22) |  | 6.83 (1.11) |  | 22.0 | 0.12 | 0.800 |
| Hayling Sentence Completion Test (total) | 17.75 (2.50) |  | 18.67 (1.56) |  | 22.5 | 0.09 | 0.851 |
| *Visual perception* |  |  |  |  |  |  |  |
| VOSP10,11 Dot Counting (/10) | 9.50 (1.00) |  | 10.00 (0.00) |  | 18.0 | 0.37 | 0.083 |
| VOSP Position Discrimination (/20) | 19.50 (1.00) |  | 20.00 (0.00) |  | 18.0 | 0.37 | 0.083 |
| VOSP Cube Analysis (/10) | 9.50 (1.00) |  | 9.58 (0.79) |  | 23.5 | 0.03 | 0.936 |
| VOSP Overall (/40) | 38.50 (3.00) |  | 39.58 (0.79) |  | 22.5 | 0.09 | 0.811 |
| *Mood* |  |  |  |  |  |  |  |
| HADS12 Anxiety | 2.75 (2.06) |  | 4.33 (2.93) |  | 15.0 | 0.57 | 0.269 |
| HADS Depression | 1.25 (0.50) |  | 2.33 (2.74) |  | 22.5 | 0.09 | 0.852 |

M = mean; SD = standard deviation; ES = effect size; HPC = hippocampal-damaged patients; CTL = control participants. P-values relate to between-group non-parametric Mann-Whitney U tests with significant differences depicted in bold. WASI = Wechsler Abbreviated Scale of Intelligence; WMS = Wechsler Memory Scale III; D-KEFS = Delis-Kaplan Executive Function System; VOSP = Visual Object and Space Perception Battery; HADS = Hospital Anxiety and Depression Scale. For the Autobiographical Interview, the scores are the average number of internal (or external) details over five memories. aThe control group consisted of twelve participants (all males, mean age 57.2 years ± 16.6). bThe control group consisted of eight participants (six males, mean age 54.63 years ± 16.32).

1-12Denote these test materials:

1. Wechsler D. 1999. *Wechsler Abbreviated Scale of Intelligence*. New York, NY: The Psychological Corporation, Harcourt Brace.

2. Levine B, Svoboda E, Hay JF, Winocur G, Moscovitch M. 2002. Aging and autobiographical memory: Dissociating episodic from semantic retrieval. *Psychology and Aging* **17**:677–689.

3. Wechsler D. 1997. T*he Wechsler Memory Scale*, Third Edition. San Antonio, TX: The Psychological Corporation.

4. Osterrieth PA. 1944. The test of copying a complex figure: a contribution to the study of perception and memory. *Archive of Psychology* **30**:286 –356.

5. Warrington EK. 1984. *Recognition Memory Test*: Manual. Berkshire, UK: NFER-Nelson.

6. McKenna P, Warrington EK. 1980. Testing for nominal dysphasia. *Journal of Neurology, Neurosurgery and Psychiatry* **43**:781–788.

7. Warrington EK. 2010. The graded naming test: a restandardisation. *Neuropsychological Rehabilitation* **7**:143–146.

8. Delis DC, Kaplan E, Kramer JH. 2001. *Delis Kaplan Executive Function System* (D-KEFS). San Antonio, TX: The Psychological Corporation.

9. Burgess P, Shallice T. 1997. *The Hayling and Brixton Tests*. Test Manual. Bury St Edmunds, UK: Thames Valley Test Company.

10. Warrington EK, James M. 1991. A new test of object decision: 2D silhouettes featuring a minimal view. *Cortex* **27**:370 –383.

11. Gabrovska V, Laws K, McKenna P. 1996. Visual form perception in schizophrenia: further evidence for a disorder of semantic memory. *European. Psychiatry* **11**:278.

12. Zigmond AS, Snaith RP. 1983. The hospital anxiety and depression scale. *Acta Psychiatrica Scandinavia* **67**:361–370.
