# Supplementary material for: Dreaming with hippocampal damage
Source: eLife. 2020 Jun 8;9:e56211. doi: 10.7554/eLife.56211 (PMC7279885; doi:10.7554/eLife.56211)
Supplement: Table 2—source data 1. [file elife-56211-table2-data1.xlsx]

## Sheet: Sheet4
	HPC		CTL					HPC1	HPC2	HPC3	HPC4	CTL1	CTL2	CTL3	CTL4	CTL5	CTL6	CTL7	CTL8	CTL9	CTL10
	M (SD)		M (SD)		U	ES	P-Value
General analysesa
Number of awakenings	6.75 (2.75)		6.90 (1.97)		18.5	0.11	0.829	10	4	5	8	8	5	9	6	4	6	8	5	10	8
Proportion of awakenings during NREM	0.73 (0.09)		0.67 (0.13)		14	0.47	0.383	0.8	0.75	0.6	0.75	0.75	0.6	0.89	0.67	0.75	0.67	0.63	0.4	0.6	0.75
Proportion of awakenings during REM	0.23 (0.17)		0.33 (0.13)		13	0.55	0.309	0	0.25	0.4	0.25	0.25	0.4	0.11	0.33	0.25	0.33	0.38	0.6	0.4	0.25
Number of probes per awakening	3.82 (1.75)		4.22 (1.13)		17	0.23	0.671	5.8	3.5	1.6	4.38	5.63	3.2	2.89	6	4.5	4	2.5	4.2	4.4	4.88
Dream frequency	0.23 (0.17)		0.67 (0.28)		4.5	1.45	0.028	0.4	0.25	0	0.25	1	0.8	0.22	0.83	0.5	0.33	0.75	0.4	1	0.88
Proportion of dreams during NREM	0.38 (0.48)		0.52 (0.20)		14.5	0.43	0.415	1	0	0	0.5	0.75	0.5	0.5	0.6	0.5	0	0.5	0.5	0.6	0.71
Proportion of dreams during REM	0.38 (0.48)		0.48 (0.20)		16	0.31	0.555	0	1	0	0.5	0.25	0.5	0.5	0.4	0.5	1	0.5	0.5	0.4	0.29
Proportion of no dreams	0.65 (0.31)		0.21 (0.24)		4	1.52	0.022	0.6	0.75	1	0.25	0	0.2	0.67	0	0.5	0.17	0.13	0.4	0	0
Proportion of blank dreams	0.13 (0.25)		0.12 (0.15)		15.5	0.35	0.496	0	0	0	0.5	0	0	0.11	0.17	0	0.5	0.13	0.2	0	0.13
Overall qualitative attributesb
Number of informative words	43.17 (16.06)		95.55 (55.20)		7	0.81	0.176	55.5	25	.	49	143	48.6	54	107.4	42.5	39.5	201.17	90	74.5	154.86
Complexity	2.67 (0.58)		3.32 (0.70)		5.5	1	0.098	3	2	.	3	3.63	3.25	3	3.2	2	3	4.67	3	3.4	4
Vividness	3.10 (0.79)		3.88 (1.08)		7.5	0.75	0.203	2.8	4	.	2.5	3.5	3	3.5	2	5	3	4.7	5.5	4.6	4
Bizarreness	1.58 (1.01)		2.27 (0.95)		8	0.7	0.232	2.75	1	.	1	3.5	1.5	1	1.8	1.5	1.5	3.67	2.5	2.4	3.29
Emotional valence	2.75 (0.25)		2.81 (0.22)		13	0.19	0.72	2.75	3	.	2.5	2.75	2.6	3	3	3	3	2.5	2.5	2.7	3
Proportion of self-references	0.84 (0.29)		0.90 (0.19)		15	0	1	1	1	.	0.5	1	1	1	0.4	1	1	0.83	1	0.9	0.86
Content characterizationb
Internal (episodic) details	4.08 (1.47)		9.13 (3.56)		2	1.54	0.028	5.75	3	.	3.5	8	8.25	9.5	8.2	5	5.5	17.33	9	7.9	12.57
External (semantic/other) details	0.17 (0.29)		1.07 (1.60)		8.5	0.64	0.258	0	0	.	0.5	1.38	0.25	0	1.6	0	0	5.17	0.5	0.1	1.71
Content score	5.75 (0.90)		13.10 (6.49)		1	1.74	0.018	6.75	5	.	5.5	12.13	10.75	10	9.2	8.5	6.5	28.33	13.5	11.9	20.14
